# Supplementary material for: Effect of Trehalose and Lactose Treatments on the Freeze-Drying Resistance of Lactic Acid Bacteria in High-Density Culture
Source: MDPI journal article supplement (doi:10.3390/microorganisms11010048), 2022-12-23
Supplement: s1 [file s1]

## Supplementary Information

### Supplemental Tables

**Table S1.** The intracellular and extracellular trehalose content of *L. fermentum* FXJCJ6-1 grown under hypo- and hypertonic conditions.

| Conditions | Extracellular trehalose content (g/L) | Intracellular trehalose content (g/L) |
|------------|---------------------------------------|---------------------------------------|
| hypotonic  | $2.00 \pm 0.01$                       | -                                     |
| hypertonic | $1.89 \pm 0.04$                       | -                                     |

Note: ‘-’ means not detected.

**Table S2.** The intracellular lactose content of *L. brevis* 173-1-2 grown under hypo- and hypertonic conditions.

| Conditions | Intracellular lactose content (g/L) |
|------------|-------------------------------------|
| hypotonic  | -                                   |
| hypertonic | -                                   |

Note: ‘-’ means not detected.

## Supplemental Figures

```

Query 1  MMSKINQTDIDRLIELVGGGRNIATVSHCITRLRFVLNQANARPKEIEQLPMVKGCFN 60
          M K TD+ + I G NI +HC TRLR VL K ++ VKG F
Sbjct 1  MDHKQVATDVIKAI-----GADNIVAAAHCAITRLRLVLKDDEAIDQKALDNDGVKGTFT 56

Query 61  AGQFQVVIGT-NVGDDYYQALIASTGQAQVDKEQVKAARHNMKWHE--QLISHFAVIFFP 117
          GQ+QV+IG +V + Y LI TG +V E +K+ N K++ I + IF P
Sbjct 57  NGQYQVVIIGPGDVNNVYDELIKQTGLKEVSTEDLKQIVAKNQKFNPMVMAFIKLLSDIFVP 116

Query 118  LLPALISGGLILGFRNVIGDLPMSNGQTLAQMYPSTIYDFLWLIGEAIFFYLPVGCW 177
          ++PAL++GGL++ NV+ + +++ QM+P+++ + + ++ A + +LP+ +
Sbjct 117  IIPALVAGGLLMALDNVLSQGLFGPKSVVQMFPKLEGMVNVMSAAPYVFLPILVGV 176

Query 178  SAVKKMGGTPILGIVLGVTLVSPQLMNAYLLGQQLPEVWDFGMFSIAKVGYYAQVIPALL 237
          S K+ G LG V+G+ + +P L W F++ Y QVIPAL
Sbjct 177  SGAKRFGANQFLGAVVGMMTAPVLAEG-----GAWHLFGFTVNIQSYTGQVIPALA 228

Query 238  AGLALGVIETRLKRIVPDYLYLVVVPVCSLILAVFLAHLIGPFGRMIGDVAFVAVRHL 297
          A L + E + +P + P+ S+IL F+ ++GP + + D + + L
Sbjct 229  AVWLISIFEKWFHKKLPSAVDFTFTPLLSVILTGFITFIVVGPVMEKLSDLITNGIVWLY 288

Query 298  TGSFAPIGAALFGFLYAPLVITGVHQTTLAIDLQMIQSMG-----GTPVWPLIALSNIAQ 352
          + + +G +FG +Y+P+V+TG+HQ+ AI+ Q++ + G ++ + ++N+AQ
Sbjct 289  S-TLGFVGTGIFGAIYSPIVLTGLHQSPAIETQLVTAYKSGTGYGDFIFVVASMANVAQ 347

Query 353  GSAVIGIISSRKHNREISVPAAISAWLGVTEPAMYGNLKYRFPMLCAMILGSLAGLL 412
          G+A + ++ + +S AA+SA LG+TEPA++G+NLK +P CA+IGS A L
Sbjct 348  GAATTAVYFLTKNEKMKGLSSSAVSAALLGITPALFGVNLKLFPPFCALIGSATAATL 407

Query 413  CGLNGVMANGIGVGGLPGILSIQPSYWQVFALAMAIAIIPIVLTSTFIYQRKYR 466
          GL V+A +G G G LSI + L ++ ++ +T F+Y + +
Sbjct 408  AGLFHVIAVSMGSAGFIGFLSIGAKSIPFYLLCELVSFVVAFTIT-FLYGKTHN 460

```

**Figure S1.** Results of amino acid sequence comparison between PTS-II-sucr in *L. fermentum*

FXJCJ6-1 and treB.

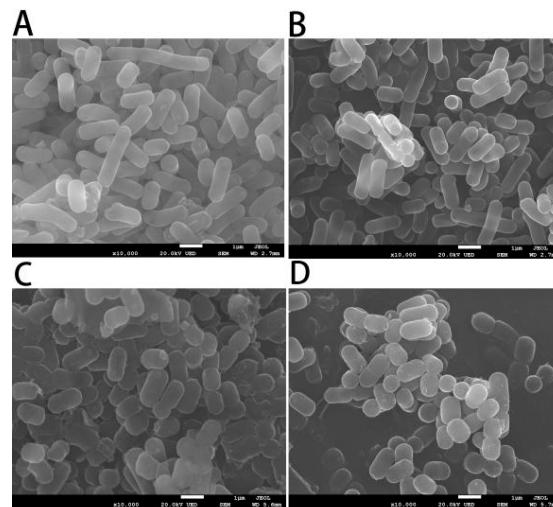

**Figure S2.** Scanning electron micrographs of the morphology of heterofermentive *Lactobacillus*

fermented with different carbohydrates. (A, B-) The bacterial morphology of *L. fermentum*

FXJCJ6-1 fermented with glucose and lactose; (C, D)-Bacterial morphology of *L. reuteri*

CCFM1040 fermented with glucose and lactose.
